# Supplementary figures and images for: Fine control of nuclear confinement identifies a threshold deformation leading to lamina rupture and induction of specific genes
Source: Royal Society of Chemistry journal article supplement (doi:10.1039/c2ib20056b), 2012-01-01

**Supplementary Figure 2**

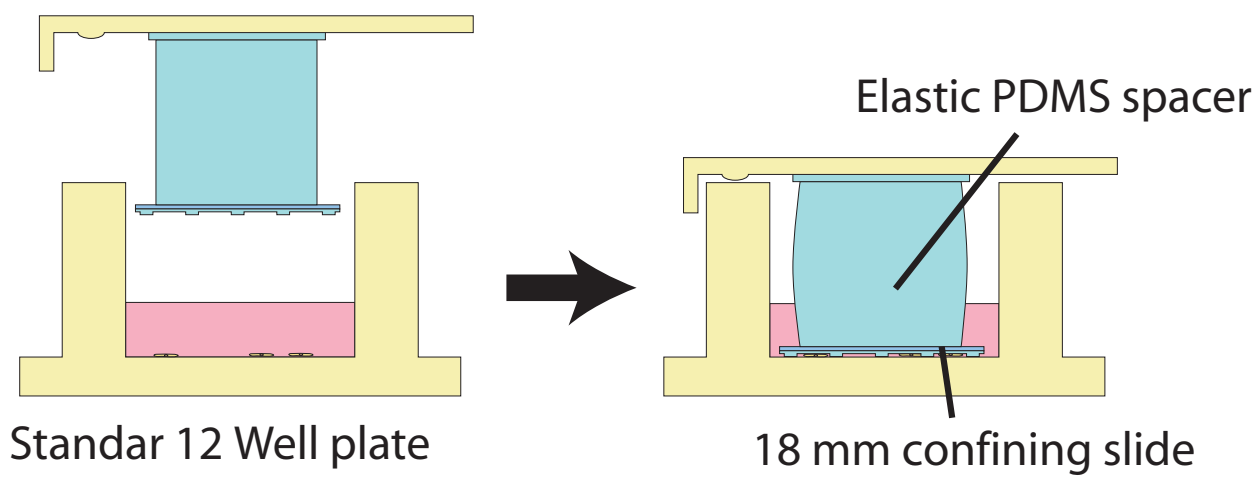

Supplement: c2ib20056b_2.pdf [file c2ib20056b_2.pdf]

# Supplementary Figure 4

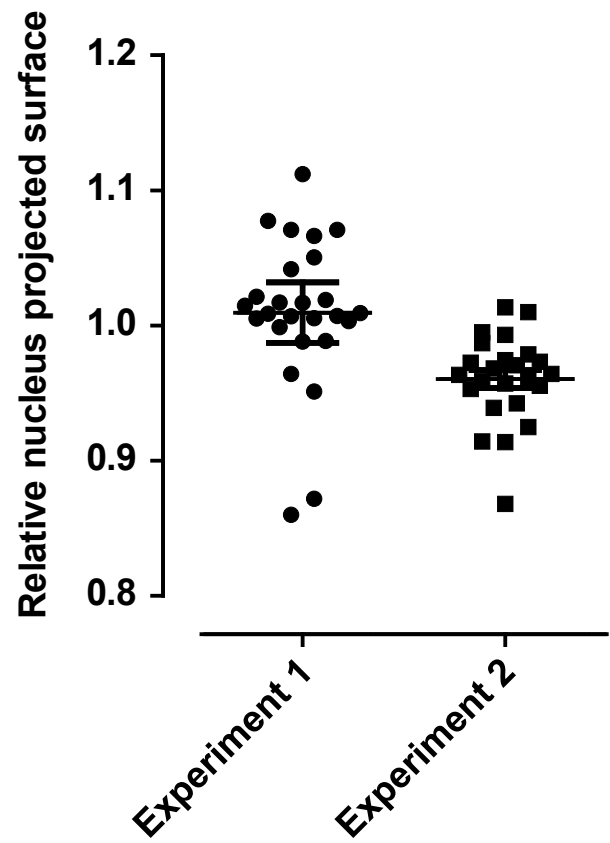

Supplement: c2ib20056b_4.pdf [file c2ib20056b_4.pdf]

# Supplementary Figure 5

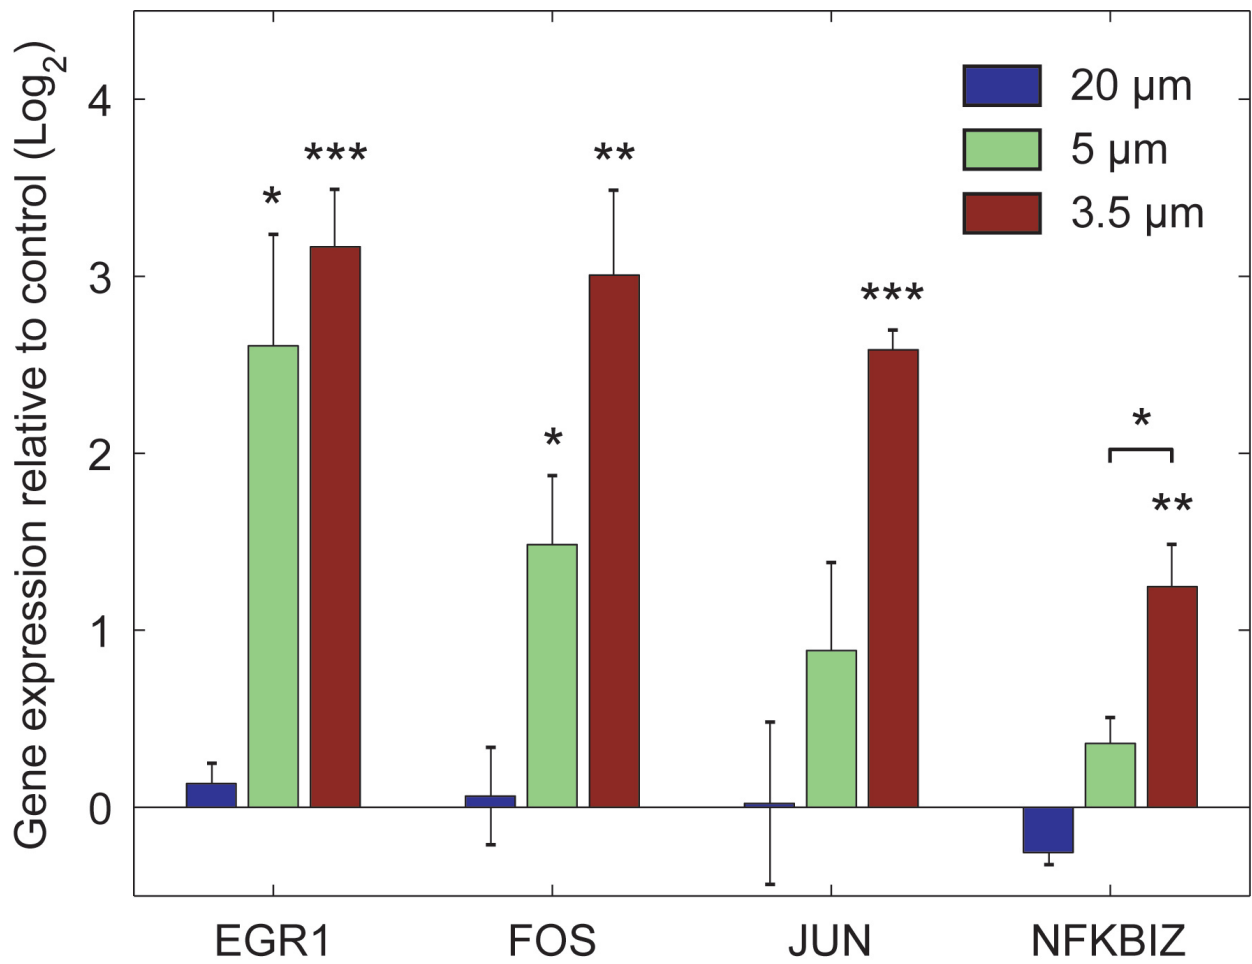

Supplement: c2ib20056b_5.pdf [file c2ib20056b_5.pdf]

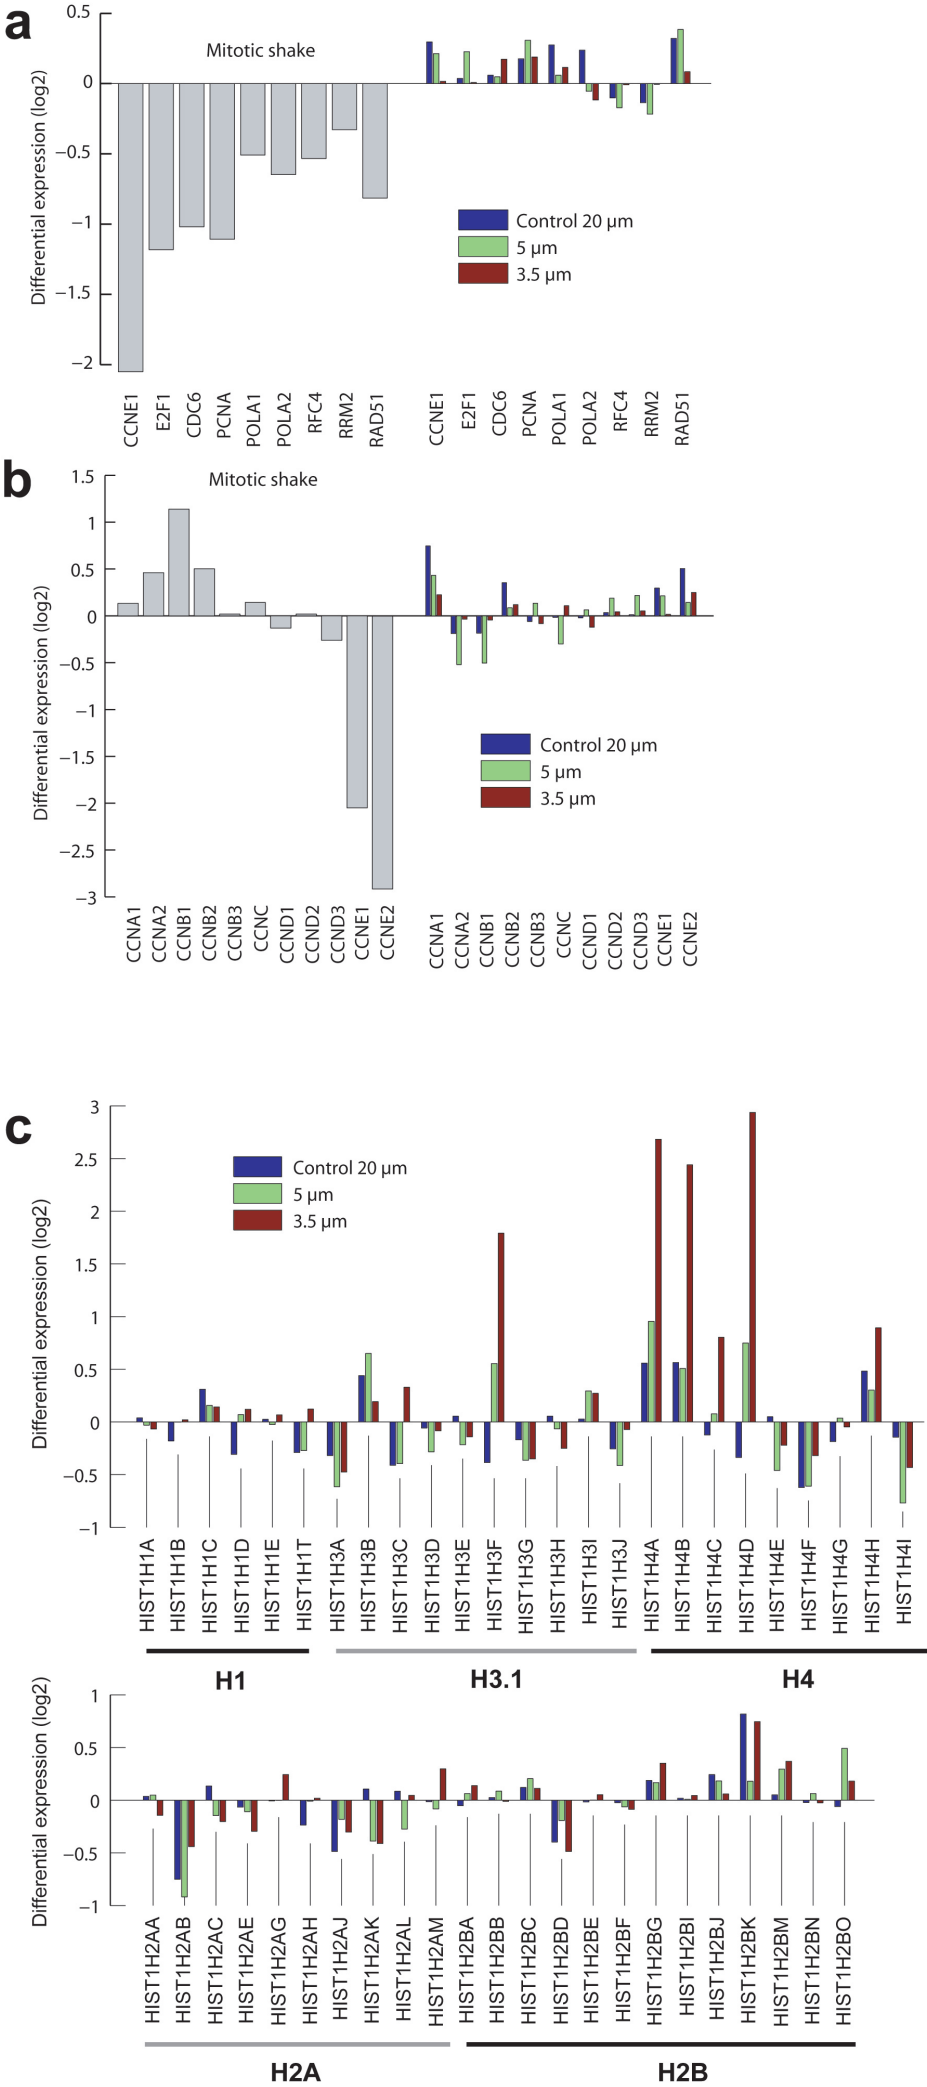

Supplementary  
Figure 6

Supplement: c2ib20056b_6.pdf [file c2ib20056b_6.pdf]
